# Supplementary material
Source: PubMed Central journal article supplement (PMC8702009)
Supplement: NIHMS1756658-supplement-Table_E1.pdf [file NIHMS1756658-supplement-Table_E1.pdf]

|                                                | II 4         |            |            |             |             |             |            |             | II 4 post  | II 5       | II 3       |      | I1         | I2                | II 1       | II 2       | Reference range |
|------------------------------------------------|--------------|------------|------------|-------------|-------------|-------------|------------|-------------|------------|------------|------------|------|------------|-------------------|------------|------------|-----------------|
|                                                | 14y          | 15y        | 17y        | 18y         | 21y         | 22y         | 23y        | 23y         | 26y        | 27y        | 26         | 27   | 49         | 48                | 28         | 25         |                 |
| IgG                                            | 1400         | 1430       | 1360       | 1360        | 1600        | 1370        | 1500       | 740         | 923        | 1280       | 1120       | 984  | 873        | 1200              | 994        | 771        | 725-1900 mg/dL  |
| IgA                                            | <b>856*</b>  | <b>674</b> | <b>618</b> | <b>703*</b> | <b>1100</b> | <b>1070</b> | <b>801</b> | <b>410*</b> | 294        | 589        | 384        | 316  | 376        | 421               | 488        | 308        | 50-340 mg/dL    |
| IgM                                            | 64           | 57         | 49         | 60          | 57          | 75          | 58         | 35          | 57         | 85         | 116        | 134  | 60         | 124               | 72         | 70         | 45-280 mg/dL    |
| C3                                             | 176          |            |            | 129         | 142         |             |            | 138         | 90         | 122        | 101        | 126  |            |                   |            |            | 75-135 mg/dL    |
| C4                                             | 41           |            |            | 25          | 37          |             |            | 50          | 31         | 22         | 17.3       | 18.6 |            |                   |            |            | 14-60 mg/dL     |
| ALC /uL                                        | 1.31         | 1.91       | 1.25       | 1.36        | 1.98        | 1.95        | 1.48       | 0.65        | 1.71       | 2          | 2.50       | 2.40 | 0.89       | 1.88              | 1.80       | 1.43       |                 |
| CD3 %                                          | 87           | 84         |            | 78          | 86          | 84          | 79         | 89          | 63         | 85         | 87         | 85   |            |                   |            |            |                 |
| CD3+DR+%                                       |              | 27         | 22         |             | 45          | 46          | 37         |             |            |            |            |      |            |                   |            |            |                 |
| TCRαβ%                                         |              |            |            |             |             | 76          | 89         |             |            | 88         | 84         | 85   |            |                   |            |            |                 |
| TCRγδ%                                         |              |            |            |             |             | 10          | 9          |             |            | 12         | 16         |      |            |                   |            |            |                 |
| CD3+CD4+%                                      | 42           | 42         | 38         | 39          | 39          | 39          | 37         | 48          | 27         | 47         | 32         | 31   |            |                   |            |            |                 |
| CD4+Ra+%                                       |              |            |            |             | 13          | 25          | 18         | 9           | 32         | 28         | 18         | 23   |            |                   |            |            |                 |
| CD4+Ro%                                        |              |            |            |             | 28          | 56          | 62         | 70          | 50         | 57         | 65         | 60   |            |                   |            |            |                 |
| CD3+CD8+%                                      | 31           | 38         | 37         | 37          | 43          | 41          | 43         | 39          | 37         | 32         | 46         | 40   |            |                   |            |            |                 |
| LTCD8Ra+%                                      |              |            |            |             | 30          | 58          | 58         | 56          | 28         | 66         | 44         | 47   |            |                   |            |            |                 |
| LTCD8Ro+%                                      |              |            |            |             | 17          | 27          | 24         | 26          | 44         | 17         | 24         | 23   |            |                   |            |            |                 |
| CD3-CD56+ %                                    | 2            | 5          | 8          | 8           | 5           | 5           | 2          | 6           | 21         | 5          | 3          | 4    |            |                   |            |            |                 |
| CD19+                                          | 9            | 12         | 14         | 14          | 8           | 8           | 18         | 4           | 15         | 8          | 9          | 10   |            |                   |            |            |                 |
| CD19+IgM+CD27-(naive) %                        |              |            |            |             |             |             | 83         |             | 90         |            |            | 74   |            |                   |            |            |                 |
| CD19+IgM+CD27-memUS %                          |              |            |            |             |             | 3           |            |             | 1          |            |            | 4    |            |                   |            |            |                 |
| CD19+IgM-CD27+memSw %                          |              |            |            |             |             | 9           |            |             | 6          |            |            | 13   |            |                   |            |            |                 |
| Transitionals %                                |              |            |            |             |             | 2           |            |             | 3          |            |            | 2    |            |                   |            |            |                 |
| Plasmablasts %                                 |              |            |            |             |             | 1           |            |             | 2          |            |            | 1    |            |                   |            |            |                 |
| CD19+CD21 low %                                |              |            |            |             |             | 5           |            |             | 2          |            |            | 9    |            |                   |            |            |                 |
| Anti EBNA IgG                                  | <b>pos</b>   |            |            |             |             |             |            |             | <b>pos</b> | <b>pos</b> | <b>pos</b> |      | <b>pos</b> | <b>pos</b>        | <b>pos</b> | <b>pos</b> |                 |
| CMV IgG                                        | <b>pos</b>   |            |            |             |             |             |            |             | <b>pos</b> | <b>pos</b> | <b>pos</b> |      | <b>pos</b> | <b>pos</b>        | <b>pos</b> | <b>pos</b> |                 |
| CMV PCR (copies / ml)                          | <b>und</b>   |            |            |             |             |             |            |             | <b>und</b> | <b>und</b> | <b>und</b> |      | <b>und</b> | <b>und</b>        | <b>und</b> | <b>und</b> |                 |
| EBV PCR (copies / ml) **                       | <b>4,6E6</b> |            |            |             |             |             |            |             | <b>und</b> | <b>2E4</b> | <b>4E3</b> |      | <b>und</b> | <b>&lt;3,5 E3</b> | <b>und</b> | <b>und</b> |                 |
| <b>II4 post: post-HSCT, complete chimerism</b> |              |            |            |             |             |             |            |             |            |            |            |      |            |                   |            |            |                 |
| <b>* : polyclonal</b>                          |              |            |            |             |             |             |            |             |            |            |            |      |            |                   |            |            |                 |
| <b>** : maximum level is depicted</b>          |              |            |            |             |             |             |            |             |            |            |            |      |            |                   |            |            |                 |
